# Supplementary material
Source: PubMed Central journal article supplement (PMC9555856)
Supplement: NIHMS1817020-supplement-Supplemental_Data_File__doc__pdf__etc__.pdf [file NIHMS1817020-supplement-Supplemental_Data_File__doc__pdf__etc__.pdf]

# Recruitment and Retention Strategies for the *Diabetes RElated to Acute Pancreatitis and Its Mechanisms (DREAM) Study*

*From the Type 1 Diabetes in Acute Pancreatitis Consortium (T1DAPC)*

## SUPPLEMENTAL DIGITAL CONTENT

**SUPPLEMENTAL TABLE 1.** Potential Recruitment and Retention Strategies for conduct of the DREAM Study

| Strategy                                          | Description                                                                                                                                                                                                                                                                           | Evaluation and Metrics                                                                                                                                                     |
|---------------------------------------------------|---------------------------------------------------------------------------------------------------------------------------------------------------------------------------------------------------------------------------------------------------------------------------------------|----------------------------------------------------------------------------------------------------------------------------------------------------------------------------|
| Study Awareness                                   |                                                                                                                                                                                                                                                                                       |                                                                                                                                                                            |
| Study website                                     | - The DREAM Study website will contain study information, participant testimonials and educational information for potential participants. The website will provide contacts at each site as well as a “Contact Us” page to reach out to the DCC.                                     | Review of participant response to how they learned about the study will be obtained with Participant Perception / Satisfaction Survey.                                     |
| Quick response (QR) code                          | - A scannable matrix barcode that can be included on the study flyer, which will link directly to the study website.                                                                                                                                                                  |                                                                                                                                                                            |
| Encounter during hospitalization*                 | - Approach potential participants to introduce DREAM study and the pancreas/research team. Prior to discharge, reconnect with the potential participant and provide DREAM study materials.                                                                                            | Responses will be reviewed to determine effective strategies. Ineffective strategies will be reconsidered.                                                                 |
| Study flyer to be included with discharge papers* | - A 1-page study flyer that includes key study and contact information and a QR code. This flyer may included in a potential participant’s discharge papers to reference.                                                                                                             |                                                                                                                                                                            |
| Post-hospitalization*                             | - Telephone follow-up 2- and 4-6 weeks following hospitalization to discuss participation                                                                                                                                                                                             |                                                                                                                                                                            |
| Advertising via social media                      | - The DREAM study will partner with established social media accounts (university or hospital, non-profit organizations, etc) to include advertisements with hyperlink to the study website.                                                                                          |                                                                                                                                                                            |
| Advertising via print materials                   | - Flyers and posters will be placed at all sites per IRB guidelines. These flyers and posters will include relevant study information and a QR code so that participants can go directly to the study website.                                                                        |                                                                                                                                                                            |
| Participant testimonials                          | - Quotes and videos describing the study experience from participants that have completed at least 1 visit will be included on the website.                                                                                                                                           |                                                                                                                                                                            |
| Site engagement                                   |                                                                                                                                                                                                                                                                                       |                                                                                                                                                                            |
| Study clinician education                         | - Sites participating in this study will explain the importance of diagnosis and EHR recordings to physicians taking care of acute pancreatitis patients, and will encourage proper EHR recording with reminders.                                                                     | Clinician education and engagement will be discussed during Recruitment and Retention Committee Meetings.                                                                  |
| Resident physician engagement                     | - Resident physicians interested in being involved with research will be educated about the study and asked to be involved in study implementation. Additionally, these physicians will also help provide <i>the return of results with a clinician consultation</i> mentioned below. |                                                                                                                                                                            |
| Gamification of participant enrollment            | - Site specific enrollment will be monitored, and sites with the most enrolled participants will receive a prize for the study team that can be sent around from site to site for pictures with the team.                                                                             | Clinician interactions will be modified based on those responses.                                                                                                          |
| Participant engagement                            |                                                                                                                                                                                                                                                                                       |                                                                                                                                                                            |
| eConsent                                          | - eConsent will be used for sites interested in enrolling study participants remotely. The eConsent will be interactive and allow participants to watch short videos to demonstrate what their experience in the study would be.                                                      | Preference for eConsent vs paper consent and participant satisfaction with these strategies can be assessed with an optional Participant Perception / Satisfaction Survey. |
| Return of results with clinician consultation     | - Clinically relevant results will be returned to participants in an easy-to-read report. A virtual or in-person meeting with a study-affiliated physician or designated study team member will then be offered to the participants so they can discuss the results in their reports. |                                                                                                                                                                            |

(Continued on next page)

**SUPPLEMENTAL TABLE 1. (Continued)**

| Strategy                                                                        | Description                                                                                                                                                                                                                                                                                                                                                                                   | Evaluation and Metrics                                                                                                                                                                                                                                                                                           |
|---------------------------------------------------------------------------------|-----------------------------------------------------------------------------------------------------------------------------------------------------------------------------------------------------------------------------------------------------------------------------------------------------------------------------------------------------------------------------------------------|------------------------------------------------------------------------------------------------------------------------------------------------------------------------------------------------------------------------------------------------------------------------------------------------------------------|
| Thank you cards<br>Diabetes information materials<br>Diabetes support referrals | - Thank you cards can be sent to the participants acknowledging their generous participation in the study.<br>- For participants diagnosed with pre-diabetes or diabetes during the study, a packet with patient education materials on diabetes will be provided.<br>- Participants diagnosed with pre-diabetes or diabetes during the study will be given referrals for additional support. |                                                                                                                                                                                                                                                                                                                  |
| Retention and participant satisfaction                                          |                                                                                                                                                                                                                                                                                                                                                                                               | Optional Participant Perception/Satisfaction survey will be reviewed periodically so that any potential issues can be avoided or corrected in a timely manner. Additionally, effective methods of engagement, retention, and participant satisfaction will be documented and shared with all study team members. |
| Participant perception/ satisfaction survey                                     | - The Research Participants Perception Survey that was developed and validated by Dr. Rhonda Kost at Rockefeller University to assess the experience of the participant in the study can be used to guide modifications to the study as needed.                                                                                                                                               |                                                                                                                                                                                                                                                                                                                  |
| Participant testimonials                                                        | - After completing at least 1 study visit, participants may be asked if they would like to share their experience with the study team. Participant testimonials will be shared per approved protocols.                                                                                                                                                                                        |                                                                                                                                                                                                                                                                                                                  |
| Contacting participants with reminders about study visits                       | - Study coordinators will contact participants by their preferred method of contact to remind them about upcoming study visits. In addition, Regenstrief Institute has provided guidance and best practices that we will use around automated patient notification via electronic health records (ie, MyChart).                                                                               |                                                                                                                                                                                                                                                                                                                  |

\*Study awareness strategies for hospitalized patients.
